# Supplementary material
Source: HighWire-hosted journal article supplement (http://rc.rcjournal.com/highwire/filestream/21399/field_highwire_adjunct_files/3/8671suppl4.pdf)

### Supplementary Figure 4

Antibiotic susceptibility of total isolates following 2 x 28 days ON + 28 days OFF Tobramycin

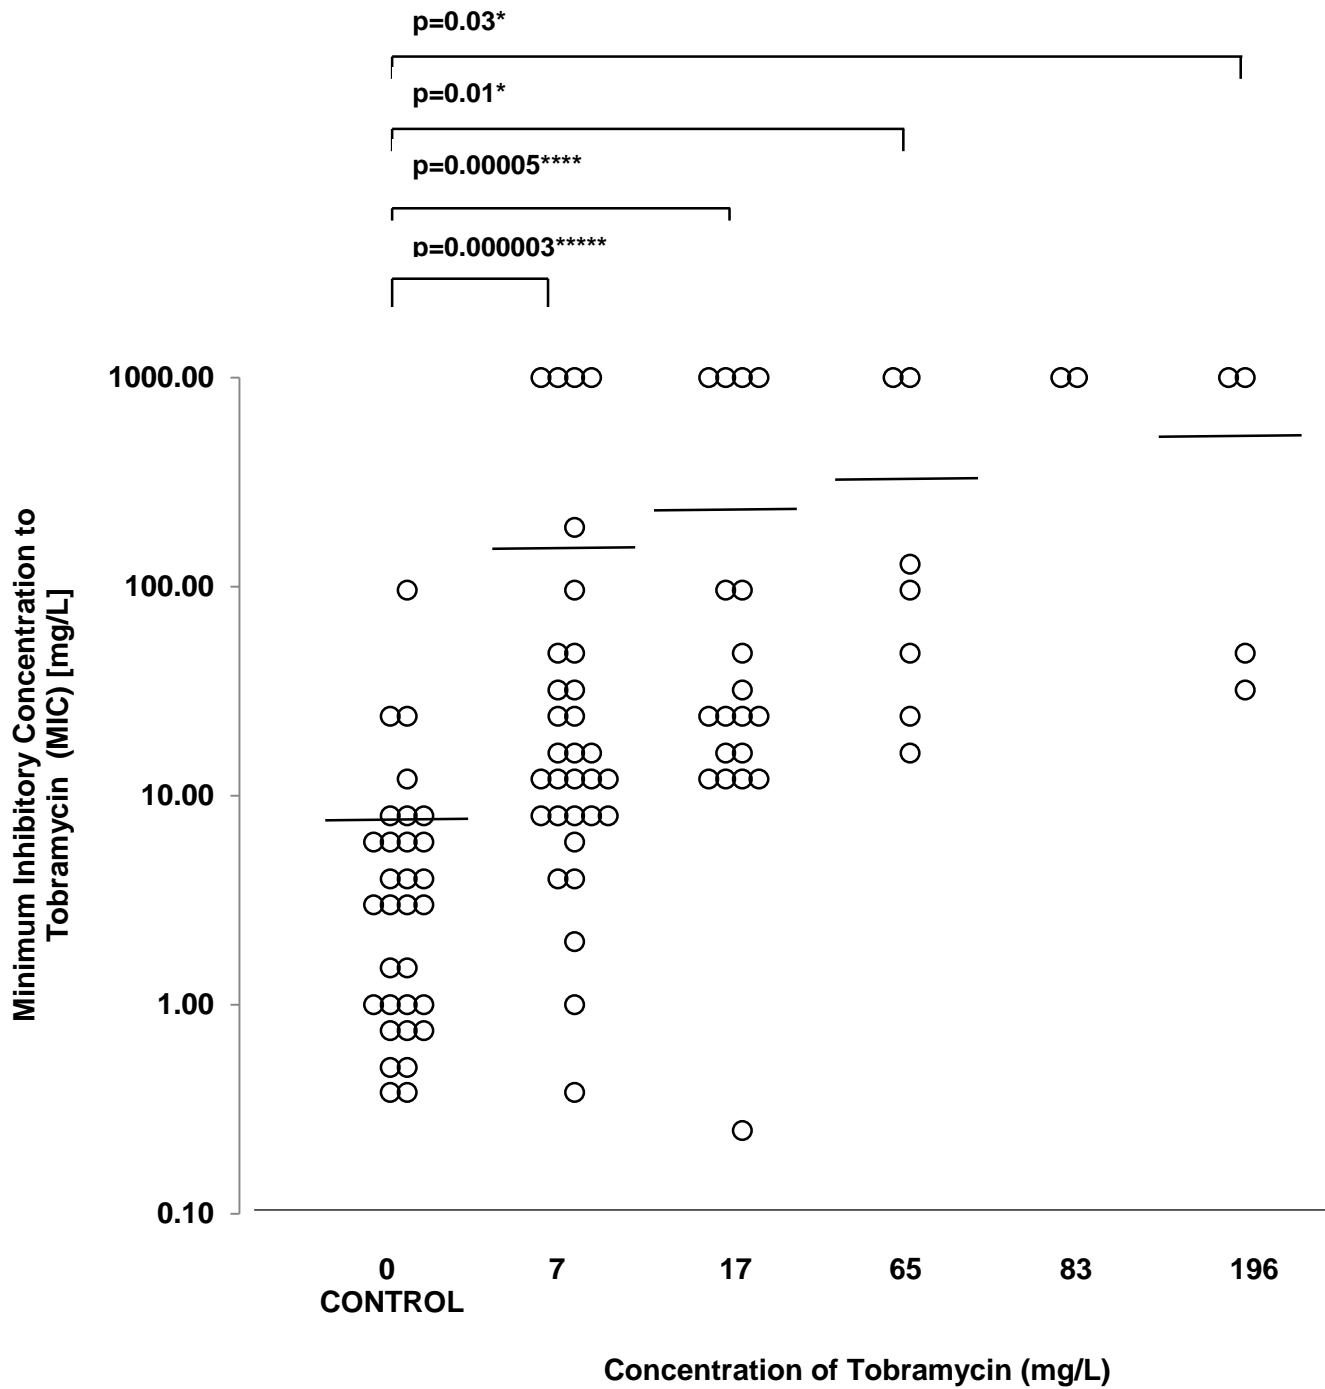

Supplement: 8671suppl4.pdf [file 8671suppl4.pdf]
